## RELATIONSHIP BETWEEN WING LOADING, WINGBEAT FREQUENCY AND BODY MASS IN HOMOPTEROUS INSECTS

By DAVID N. BYRNE

*Department of Entomology, University of Arizona, Tucson, AZ 85721, USA*

STEPHEN L. BUCHMANN AND HAYWARD G. SPANGLER

*USDA-ARS Carl Hayden Bee Research Center, 2000 E. Allen Rd, Tucson,  
AZ 85719, USA*

*Accepted 17 September 1987*

### SUMMARY

Several biophysical properties of members of Aleyrodidae and Aphididae were examined in order to explore how homopterous insects fly. Five species of aphids were found to weigh significantly more than five whitefly species (range  $1.14\text{--}7.02 \times 10^{-4}$  g for aphids *vs*  $3.3\text{--}8.0 \times 10^{-5}$  g for whiteflies) and to have significantly larger wing surface areas (range  $0.0103\text{--}0.1106$  cm<sup>2</sup> *vs*  $0.0096\text{--}0.0264$  cm<sup>2</sup>). As a consequence whiteflies and aphids can be partitioned into two groups with respect to wing loading (range  $0.00633\text{--}0.01412$  g cm<sup>-2</sup> for aphids,  $1.74\text{--}5.23 \times 10^{-3}$  g cm<sup>-2</sup> for whiteflies). Members of the two families are also separated in terms of wingbeat frequency (range 81.1–123.4 Hz for aphids, 165.6–224.2 Hz for whiteflies). Since our animals were much smaller than any insects examined previously for these parameters, values were compared with the same parameters for 149 insect species recorded in the literature. Using these data, we found wingbeat frequency to be significantly correlated with wing loading only in insects weighing more than 0.03 g. Larger insects seem to employ a strategy similar to other flying animals, by compensating for high wing loading with higher wingbeat frequencies. The lack of correlation for these two parameters in insects weighing less than 0.03 g probably results from the use of different flying strategies. These include employment of a clap and fling mechanism and the possession by some of exceedingly low wing loading. Also, small insects may have reduced settling velocities because they possess high drag coefficients. Previous studies which failed to establish a relationship between wing loading and wingbeat frequency in larger insects may have considered too few subjects or too great a range of body masses. The mass range is important because smaller insects which employ increased wingbeat frequency must use rates exponentially higher than those of larger insects utilizing the same strategy.

### INTRODUCTION

Whiteflies do not as readily engage in vertical flight as other homopterous insects, such as aphids. This was discovered when Byrne, von Bretzel & Hoffman (1986)

Key words: wing loading, wingbeat frequency, body mass, insects.

placed traps at heights of 0–15 cm, 50–65 cm and 100–115 cm to catch sweetpotato whiteflies, *Bemisia tabaci* (Gennadius) and bandedwinged whiteflies, *Trialeurodes abutilonea* (Haldeman). During two growing seasons, 81 % of the whiteflies were captured in the lowest traps, 12 % in the midlevel traps and 7 % in the highest traps. In a previous survey of alate aphids, Broadbent (1948) placed traps at heights of 5–36 cm, 81–118 cm and 157–188 cm. Over a 24-week period in his study, 14 % of the aphids were caught in the lowest traps, 34 % in the midlevel traps and 52 % in the highest traps. These findings led us to examine how members of these two homopterous families might differ in their flight mechanisms, particularly with regard to wing loading and wingbeat frequency.

#### MATERIALS AND METHODS

The members of Aleyrodidae we examined were *Aleurothrixus floccosus* (Maskell), *Bemisia tabaci*, *Dialeurodes citri* (Ashmead), *Trialeurodes abutilonea* and *Trialeurodes vaporariorum* (Westwood). Members of Aphididae were *Aphis fabae* Scopoli, *Aphis gossypii* Glover, *Aphis nerii* Fonscolombe, *Acyrtosiphon kondoi* Shinji and *Myzus persicae* (Sulzer). All species were reared in greenhouses or on research plots at agricultural experimental stations maintained by the University of Arizona at Tucson and the University of California at Riverside. Italian honeybees, *Apis mellifera* L., from the USDA Carl Hayden Bee Research Center in Tucson, AZ, were also measured to compare our data with those in the literature.

Using a Datamate 100 Microfiche Reader, we determined wing surface areas for all species by projecting images of their wings onto transparent acetate sheets. Templates of images were cut from the sheets and weighed. A linear regression equation, relating template masses of known dimensions to their surface areas, was developed. Surface areas for wings were calculated by inserting the masses of their templates into this equation. Wing lengths were determined using an ocular micrometer in a dissecting microscope. Fresh whole masses were obtained by immobilizing the insects with carbon dioxide and weighing them with either a Cahn 25 or Cahn 29 Microbalance.

Wing loadings for these insects were calculated in  $\text{g cm}^{-2}$  by dividing mass by total wing surface area. Total wing surface area was determined by summing twice the mean of the forewing area with twice the mean of the hindwing area.

Wingbeat frequencies were obtained with an optical tachometer, in a manner similar to that of Unwin & Ellington (1979), and a Nicolet 206 digital oscilloscope. Insects were allowed to fly freely inside a covered greenhouse at  $24 \pm 3^\circ\text{C}$ . A wingbeat frequency was obtained for the sexually dimorphic *D. citri* but, since separate values could not be determined for the two sexes, this species was not considered in statistical comparisons of wingbeat frequencies.

The number of animals measured for each variable was determined by examining coefficients of variation as data sets were accumulated. The data were tested for normality using the Shapiro–Wilk statistic (Shapiro & Wilk, 1965). If samples were normally distributed, a *t*-test or Student *F*-test was used to compare sample means.

Otherwise, Ansari–Bradley (Ansari & Bradley, 1960) and Mann–Whitney (Mann & Whitney, 1947) nonparametric tests for equality of dispersion were used. Statistical analysis was done using the RS/1 software system on a Digital Equipment Corporation Professional 350 microcomputer.

To compare aphids and whiteflies with other insects, we compiled data from the literature for 149 insect species with known values for wing loading, wingbeat frequency and wing surface area. Certain data were corrected to match our selected format for presentation. Only species with known values for all three variables were used.

## RESULTS

Morphometrics for our homopterans appear in Table 1 as numbers 1–11. Table 1 also provides rankings of the animals measured in this study with respect to values in the literature for the same parameters. These are shown parenthetically in the columns for mass, wing area, wing loading and wingbeat frequency. For example, *B. tabaci* wingbeat frequency ranked as the 134th highest of 158 recorded frequencies.

The data for the honeybees we measured appear as number 54 in Table 1. Our results compare favourably with those reported earlier by Magnan (1934) and Sotavalta (1952) which are shown as numbers 49 and 50.

All wing area and wing length measurements had low coefficients of variation (c.v.), <15%, indicating that 20 individuals would constitute an adequate sample size. Wingbeat frequencies also had low c.v. (<10%), and only 10 individuals were measured. Body masses were more variable, and 40 individuals were weighed (c.v. <40%). Unlike the other insects we measured, *D. citri* males and females were significantly different in terms of the two important flight-associated parameters: body mass and wing surface area ( $P < 0.05$ ). Consequently, all values for the measured variables, with the exception of wingbeat frequency (not given), are listed separately for *D. citri* males and females.

### *Wing surface areas and lengths*

The forewing surface areas of the measured animals were significantly larger than those of their hindwings ( $P < 0.01$ ). Generally, aphids had significantly larger forewings and hindwings than whiteflies, although *Ap. gossypii* was an exception ( $P < 0.01$ ). Aphid forewings and hindwings were also longer than the forewings and hindwings of whiteflies ( $P < 0.01$ ) (Table 2).

### *Body masses*

Body masses are given in Table 1. Aphids were significantly larger than whiteflies; ranges were  $1.14\text{--}7.02 \times 10^{-4}$  g for aphids and  $3.3\text{--}8.0 \times 10^{-5}$  g for whiteflies ( $P < 0.01$ ). Almost all body masses of the measured animals were significantly different from one another ( $P < 0.01$ ). The exceptions were two whiteflies, *D. citri* males and *T. vaporariorum* ( $P > 0.01$ ).

Table 1. *Insect flight-associated morphometrics*

| Family                    | Species                           | Mass<br>(g)                | Wing area<br>(cm <sup>2</sup> ) | Wing<br>loading<br>(g cm <sup>-2</sup> ) | Wingbeat<br>frequency<br>(Hz) | Citation        |
|---------------------------|-----------------------------------|----------------------------|---------------------------------|------------------------------------------|-------------------------------|-----------------|
| 1. Aleyrodidae            | <i>Bemisia tabaci</i>             | $3.3 \times 10^{-5}$ (1)*  | 0.0134 (3)                      | $2.45 \times 10^{-3}$ (3)                | 168.6 (134)                   | Present study   |
| 2. Aleyrodidae            | <i>Trialeurodes vaporariorum</i>  | $3.5 \times 10^{-5}$ (2)   | 0.0165 (4)                      | $2.12 \times 10^{-3}$ (2)                | 180.0 (139)                   | Present study   |
| 3. Aleyrodidae            | <i>Dialeurodes citri</i> (male)   | $3.6 \times 10^{-5}$ (3)   | 0.0207 (6)                      | $1.74 \times 10^{-3}$ (1)                | —                             | Present study   |
| 4. Aleyrodidae            | <i>Trialeurodes abutilonea</i>    | $5.0 \times 10^{-5}$ (4)   | $9.6 \times 10^{-3}$ (1)        | $5.23 \times 10^{-3}$ (7)                | 224.2 (152)                   | Present study   |
| 5. Aleyrodidae            | <i>Aleurothrixus floccosus</i>    | $6.5 \times 10^{-5}$ (5)   | 0.194 (5)                       | $3.36 \times 10^{-3}$ (5)                | 165.6 (133)                   | Present study   |
| 6. Aleyrodidae            | <i>Dialeurodes citri</i> (female) | $8.0 \times 10^{-5}$ (6)   | 0.0264 (8)                      | $3.03 \times 10^{-3}$ (4)                | —                             | Present study   |
| 7. Aphididae              | <i>Aphis gossypii</i>             | $1.14 \times 10^{-4}$ (7)  | 0.0103 (2)                      | 0.01106 (18)                             | 123.4 (110)                   | Present study   |
| 8. Aphididae              | <i>Myzus persicae</i>             | $3.34 \times 10^{-4}$ (8)  | 0.0237 (7)                      | 0.01412 (22)                             | 90.9 (94)                     | Present study   |
| 9. Aphididae              | <i>Aphis fabae</i>                | $4.11 \times 10^{-4}$ (9)  | 0.0526 (10)                     | $7.8 \times 10^{-3}$ (13)                | 104.7 (101)                   | Present study   |
| 10. Aphididae             | <i>Aphis nerii</i>                | $4.67 \times 10^{-4}$ (10) | 0.0663 (13)                     | $7.5 \times 10^{-3}$ (12)                | 118.1 (104)                   | Present study   |
| 11. Aphididae             | <i>Acyrtosiphon kondoi</i>        | $7.02 \times 10^{-4}$ (11) | 0.1106 (14)                     | $6.33 \times 10^{-3}$ (10)               | 81.1 (89)                     | Present study   |
| 12. Trichoceridae<br>(2)† | <i>Trichocera</i> sp.             | $1.2 \times 10^{-3}$       | 0.200                           | $6.00 \times 10^{-3}$                    | 74                            | Sotavalta, 1952 |
| 13. Culicidae (2)         | <i>Aedes aegypti</i>              | $1.5 \times 10^{-3}$       | 0.037                           | 0.039                                    | 480                           | Sotavalta, 1952 |
| 14. Drosophilidae         | <i>Drosophila virilis</i>         | $2.0 \times 10^{-3}$       | 0.058                           | 0.04                                     | 240                           | Weis-Fogh, 1972 |
| 15. Drosophilidae         | <i>Drosophila virilis</i>         | $2.0 \times 10^{-3}$       | 0.058                           | 0.034                                    | 195                           | Vogel, 1966     |
| 16. Culicidae             | Culicidae sp.                     | $5.8 \times 10^{-3}$       | 0.150                           | 0.039                                    | 277                           | Sotavalta, 1952 |
| 17. Culicidae             | <i>Theobaldia annulata</i>        | $9.9 \times 10^{-3}$       | 0.169                           | 0.059                                    | 262                           | Sotavalta, 1952 |
| 18. Anthomyiidae          | <i>Fannia scalaris</i>            | 0.010                      | 0.196                           | 0.051                                    | 210                           | Magnan, 1934    |
| 19. Muscidae              | <i>Musca domestica</i>            | 0.012                      | 0.200                           | 0.060                                    | 190                           | Magnan, 1934    |
| 20. Syrphidae             | <i>Platycheirus peltatus</i>      | 0.0128                     | 0.230                           | 0.056                                    | 147                           | Weis-Fogh, 1973 |
| 21. Syrphidae (3)         | <i>Sphaerophoria scripta</i>      | 0.0193                     | 0.200                           | 0.094                                    | 308                           | Weis-Fogh, 1973 |
| 22. Syrphidae             | <i>Syrphus grussulariae</i>       | 0.0200                     | 0.480                           | 0.042                                    | 114                           | Weis-Fogh, 1973 |
| 23. Noctuidae             | <i>Venilia macularia</i>          | 0.021                      | 3.400                           | 0.006                                    | 25                            | Magnan, 1934    |
| 24. Apidae                | <i>Apis</i> sp.                   | 0.0213                     | 0.20                            | 0.11                                     | 130                           | Ahmad, 1984     |
| 25. Syrphidae (3)         | <i>Syrphus corollae</i>           | 0.0213                     | 0.350                           | 0.061                                    | 174                           | Weis-Fogh, 1973 |
| 26. Syrphidae             | <i>Syrphus nitens</i>             | 0.022                      | 0.300                           | 0.073                                    | 172                           | Weis-Fogh, 1973 |
| 27. Calliphoridae         | <i>Calliphora erythrocephala</i>  | 0.023                      | 0.240                           | 0.096                                    | 160                           | Magnan, 1934    |
| 28. Syrphidae (7)         | <i>Syrphus balteatus</i>          | 0.0232                     | 0.490                           | 0.047                                    | 138                           | Weis-Fogh, 1973 |
| 29. Panorpidae            | <i>Panorpa communis</i>           | 0.030                      | 1.750                           | 0.017                                    | 28                            | Magnan, 1934    |
| 30. Tipulidae (12)        | <i>Tipula</i> sp.                 | 0.030                      | 1.110                           | 0.027                                    | 52                            | Sotavalta, 1952 |
| 31. Ichneumonidae         | <i>Ophion luteus</i>              | 0.033                      | 1.5501                          | 0.021                                    | 62                            | Sotavalta, 1952 |

|                        |                                  |        |        |        |       |                           |
|------------------------|----------------------------------|--------|--------|--------|-------|---------------------------|
| 32. Calliphoridae      | <i>Catabomba pirasini</i>        | 0.034  | 0.400  | 0.085  | 190   | Magnan, 1934              |
| 33. Picridae           | <i>Pteris napi</i>               | 0.037  | 8.530  | 0.004  | 6     | Sotavalta, 1952           |
| 34. Syrphidae (3)      | <i>Syrphus ribesii</i>           | 0.0371 | 0.450  | 0.082  | 186   | Weis-Fogh, 1973           |
| 35. Syrphidae          | <i>Syrphus vitripennis</i>       | 0.0385 | 0.480  | 0.080  | 196   | Weis-Fogh, 1973           |
| 36. Sphecidae          | <i>Amnophila sabulosa</i>        | 0.045  | 0.420  | 0.11   | 120   | Magnan, 1934              |
| 37. Sarcophagidae      | <i>Sarcophaga carnaria</i>       | 0.045  | 0.36   | 0.125  | 160   | Magnan, 1934              |
| 38. Satyridae          | <i>Coenonympha pamphilus</i>     | 0.046  | 4.80   | 0.010  | 22    | Magnan, 1934              |
| 39. Calliphoridae (12) | <i>Calliphora erythrocephala</i> | 0.053  | 0.578  | 0.092  | 162   | Sotavalta, 1952           |
| 40. Libellulidae       | <i>Perithemis tenera</i>         | 0.061  | 3.812  | 0.016  | 39.4  | May, 1981                 |
| 41. Syrphidae          | <i>Chrysotoxum vernale</i>       | 0.064  | 0.600  | 0.107  | 150   | Magnan, 1934              |
| 42. Tipulidae          | <i>Tipula gigantea</i>           | 0.069  | 2.260  | 0.030  | 48    | Magnan, 1934              |
| 43. Syrphidae          | <i>Eristalis arbustorum</i>      | 0.0705 | 0.410  | 0.172  | 211   | Weis-Fogh, 1973           |
| 44. Apidae             | <i>Euglossa saphirina</i>        | 0.071  | 0.35   | 0.20   | 265   | Casey, May & Morgan, 1985 |
| 45. Syrphidae          | <i>Chrysotoxum arcuatum</i>      | 0.073  | 0.740  | 0.099  | 144   | Magnan, 1934              |
| 46. Syrphidae          | <i>Eristalis tenax</i>           | 0.073  | 0.740  | 0.099  | 210   | Magnan, 1934              |
| 47. Syrphidae          | <i>Volucella pellucens</i>       | 0.073  | 0.780  | 0.094  | 120   | Magnan, 1934              |
| 48. Syrphidae          | <i>Chrysotoxum bicinctum</i>     | 0.075  | 0.680  | 0.110  | 120   | Magnan, 1934              |
| 49. Apidae             | <i>Apis mellifera</i>            | 0.078  | 0.420  | 0.186  | 250   | Magnan, 1934              |
| 50. Apidae (4)         | <i>Apis mellifera</i>            | 0.085  | 0.5878 | 0.145  | 240   | Sotavalta, 1952           |
| 51. Lasiocampidae      | <i>Malacosoma americanum</i>     | 0.088  | 2.36   | 0.04   | 58    | Casey, 1981               |
| 52. Apidae (4)         | <i>Euglossa mandibularis</i>     | 0.090  | 0.44   | 0.20   | 209   | Casey <i>et al.</i> 1985  |
| 53. Vespidae (2)       | <i>Vespa vulgaris</i>            | 0.090  | 0.834  | 0.108  | 143   | Sotavalta, 1952           |
| 54. Apidae             | <i>Apis mellifera</i>            | 0.1008 | 0.5738 | 0.1760 | 197.0 | Present study             |
| 55. Lymantriidae       | <i>Lymantria dispar</i>          | 0.101  | 5.39   | 0.02   | 27    | Casey, 1981               |
| 56. Apidae             | <i>Euglossa dissimula</i>        | 0.104  | 0.45   | 0.23   | 220   | Casey <i>et al.</i> 1985  |
| 57. Lepidoptera        | <i>Rhodocera rhanni</i>          | 0.107  | 12.00  | 0.0099 | 21    | Magnan, 1934              |
| 58. Cantharidae        | <i>Telephorus fuscus</i>         | 0.109  | 1.160  | 0.094  | 72    | Magnan, 1934              |
| 59. Syrphidae          | <i>Eristalis tenax</i>           | 0.111  | 0.806  | 0.138  | 164   | Weis-Fogh, 1973           |
| 60. Lepidoptera        | <i>Poecilocampa populi</i>       | 0.112  | 3.170  | 0.035  | 55    | Sotavalta, 1952           |
| 61. Vespidae           | <i>Polistes gallicus</i>         | 0.115  | 0.460  | 0.250  | 220   | Magnan, 1934              |
| 62. Syrphidae          | <i>Volucella plumata</i>         | 0.124  | 0.920  | 0.135  | 120   | Magnan, 1934              |
| 63. Pieridae           | <i>Pieris brassicae</i>          | 0.127  | 18.400 | 0.007  | 12    | Magnan, 1934              |
| 64. Zygenidae          | <i>Zygoena filipendulae</i>      | 0.127  | 3.000  | 0.042  | 48    | Magnan, 1934              |
| 65. Syrphidae (6)      | <i>Eristalis tenax</i>           | 0.129  | 0.827  | 0.156  | 181   | Sotavalta, 1952           |

Table 1. *Continued*

| Family              | Species                         | Mass<br>(g) | Wing area<br>(cm <sup>2</sup> ) | Wing<br>loading<br>(g cm <sup>-2</sup> ) | Wingbeat<br>frequency<br>(Hz) | Citation                  |
|---------------------|---------------------------------|-------------|---------------------------------|------------------------------------------|-------------------------------|---------------------------|
| 66. Noctuidae       | <i>Aprostis exclamatoris</i>    | 0.133       | 3.20                            | 0.04                                     | 41                            | Magnan, 1934              |
| 67. Nymphalidae     | <i>Vanessa atalanta</i>         | 0.134       | 10.800                          | 0.012                                    | 10                            | Magnan, 1934              |
| 68. Cerambycidae    | Cerambycidae sp.                | 0.142       | 1.33                            | 0.107                                    | 80                            | Sotavalta, 1952           |
| 69. Pieridae        | <i>Pteris brassicae</i>         | 0.144       | 17.200                          | 0.08                                     | 10.5                          | Sotavalta, 1952           |
| 70. Noctuidae       | <i>Plusia gamma</i>             | 0.144       | 4.400                           | 0.033                                    | 48                            | Magnan, 1934              |
| 71. Apidae          | <i>Bombus hortorum</i>          | 0.159       | 0.900                           | 0.177                                    | 135                           | Magnan, 1934              |
| 72. Spingidae       | <i>Chelonia villica</i>         | 0.165       | 8.000                           | 0.021                                    | 20                            | Magnan, 1934              |
| 73. Cordulidae      | <i>Tetragoneuria cynosura</i>   | 0.165       | 7.500                           | 0.022                                    | 27.6                          | May, 1981                 |
| 74. Saturniidae (5) | <i>Hylesia</i> spp.             | 0.168       | 2.334                           | 0.072                                    | 32.4                          | Bartholomew & Casey, 1978 |
| 75. Apidae (6)      | <i>Englossa imperialis</i>      | 0.169       | 0.79                            | 0.21                                     | 179                           | Casey <i>et al.</i> 1985  |
| 76. Nymphalidae     | <i>Vanessa cardui</i>           | 0.173       | 10.400                          | 0.017                                    | 20                            | Magnan, 1934              |
| 77. Libellulidae    | <i>Erythemis simplicicollis</i> | 0.176       | 8.38                            | 0.021                                    | 28                            | May, 1981                 |
| 78. Libellulidae    | <i>Pachydiplax longipennis</i>  | 0.178       | 8.476                           | 0.021                                    | 24.3                          | May, 1981                 |
| 79. Vespidae        | <i>Vespa germanica</i>          | 0.187       | 0.980                           | 0.191                                    | 110                           | Magnan, 1934              |
| 80. Spingidae       | <i>Macroglossa bombylifomis</i> | 0.189       | 2.620                           | 0.072                                    | 80                            | Magnan, 1934              |
| 81. Nymphalidae     | <i>Vanessa io</i>               | 0.195       | 14.000                          | 0.0147                                   | 18                            | Magnan, 1934              |
| 82. Saturniidae (2) | <i>Hyperichirca nausica</i>     | 0.200       | 3.950                           | 0.051                                    | 21.6                          | Bartholomew & Casey, 1978 |
| 83. Notodontidae    | <i>Notodonta dictaea</i>        | 0.201       | 5.000                           | 0.040                                    | 22                            | Magnan, 1934              |
| 84. Apidae          | <i>Bombus muscorum</i>          | 0.226       | 0.900                           | 0.251                                    | 128                           | Magnan, 1934              |
| 85. Diptera         | <i>Dasyvramphus atra</i>        | 0.233       | 1.500                           | 0.155                                    | 100                           | Magnan, 1934              |
| 86. Lymantriidae    | <i>Dasichytra puctibunda</i>    | 0.237       | 8.000                           | 0.030                                    | 28                            | Magnan, 1934              |
| 87. Vespidae        | <i>Vespa germanica</i>          | 0.240       | 1.330                           | 0.180                                    | 139                           | Sotavalta, 1952           |
| 88. Libellulidae    | <i>Libellula depressa</i>       | 0.245       | 13.200                          | 0.019                                    | 20                            | Magnan, 1934              |
| 89. Libellulidae    | <i>Orthetrum coerulescens</i>   | 0.248       | 10.800                          | 0.023                                    | 20                            | Magnan, 1934              |
| 90. Scutelleridae   | <i>Chrysocoris purpureus</i>    | 0.264       | 1.50                            | 0.18                                     | 100                           | Ahmad, 1984               |
| 91. Tabanidae       | <i>Tabanus bovinus</i>          | 0.276       | 1.840                           | 0.150                                    | 96                            | Magnan, 1934              |
| 92. Nymphalidae     | <i>Argynnis pandora</i>         | 0.278       | 18.00                           | 0.015                                    | 10                            | Magnan, 1934              |
| 93. Libellulidae    | <i>Sympetrum meridionale</i>    | 0.281       | 10.000                          | 0.028                                    | 21                            | Magnan, 1934              |
| 94. Spingidae       | <i>Macroglossa stelarorum</i>   | 0.282       | 3.790                           | 0.074                                    | 73                            | Sotavalta, 1952           |
| 95. Melolonthidae   | <i>Amphimallon solstitialis</i> | 0.291       | 2.290                           | 0.127                                    | 78                            | Sotavalta, 1952           |
| 96. Saturniidae (4) | <i>Automeris jacunda</i>        | 0.298       | 7.572                           | 0.039                                    | 17.1                          | Bartholomew & Casey, 1978 |

|                      |                                  |       |        |       |      |                           |
|----------------------|----------------------------------|-------|--------|-------|------|---------------------------|
| 97. Papilionidae     | <i>Papilio podalirius</i>        | 0.300 | 36.000 | 0.008 | 10   | Magnan, 1934              |
| 98. Libellulidae (4) | <i>Leptetrum quadrimaculatum</i> | 0.307 | 10.600 | 0.029 | 21   | Magnan, 1934              |
| 99. Libellulidae     | <i>Pantala flavescens</i>        | 0.308 | 15.400 | 0.020 | 22.9 | May, 1981                 |
| 100. Gomphidae       | <i>Ophiogomphus serpentinus</i>  | 0.312 | 9.400  | 0.033 | 42   | Magnan, 1934              |
| 101. Libellulidae    | <i>Libellula luctuosa</i>        | 0.318 | 13.826 | 0.023 | 19   | May, 1981                 |
| 102. Sphingidae      | <i>Macroglossa stellatarum</i>   | 0.345 | 4.000  | 0.086 | 85   | Magnan, 1934              |
| 103. Corduliidae     | <i>Sonotochlora tenebrosa</i>    | 0.352 | 12.138 | 0.029 | 25.8 | May, 1981                 |
| 104. Libellulidae    | <i>Tramea canolina</i>           | 0.358 | 17.900 | 0.020 | 23.6 | May, 1981                 |
| 105. Libellulidae    | <i>Platheimis lydia</i>          | 0.365 | 10.735 | 0.034 | 31.4 | May, 1981                 |
| 106. Libellulidae    | <i>Tramea lacerata</i>           | 0.382 | 18.190 | 0.021 | 26.8 | May, 1981                 |
| 107. Apidae          | <i>Bombus terrestris</i>         | 0.388 | 1.420  | 0.273 | 130  | Magnan, 1934              |
| 108. Sphingidae      | <i>Eryx ocypte</i>               | 0.388 | 2.950  | 0.132 | 56.1 | Bartholomew & Casey, 1978 |
| 109. Saturniidae     | <i>Automeris fieldi</i>          | 0.394 | 8.680  | 0.045 | 17.4 | Bartholomew & Casey, 1978 |
| 110. Apidae (2)      | <i>Eulaena nigrita</i>           | 0.399 | 1.67   | 0.24  | 149  | Casey <i>et al.</i> 1985  |
| 111. Apidae (4)      | <i>Eufresia pulchra</i>          | 0.425 | 1.27   | 0.33  | 170  | Casey <i>et al.</i> 1985  |
| 112. Saturniidae (3) | <i>Automeris sagana</i>          | 0.428 | 8.297  | 0.052 | 19.0 | Bartholomew & Casey, 1978 |
| 113. Aeschnidae      | <i>Nasaeschna pentacantha</i>    | 0.430 | 16.538 | 0.026 | 21.1 | May, 1981                 |
| 114. Noctuidae       | <i>Triphoena pronuba</i>         | 0.485 | 7.800  | 0.062 | 24   | Magnan, 1934              |
| 115. Saturniidae     | <i>Adeloneivaia subungulata</i>  | 0.487 | 2.900  | 0.168 | 41.0 | Bartholomew & Casey, 1978 |
| 116. Apidae          | <i>Bombus lapidarius</i>         | 0.495 | 1.650  | 0.300 | 90   | Magnan, 1934              |
| 117. Libellulidae    | <i>Libellula pulchella</i>       | 0.508 | 16.387 | 0.031 | 26.2 | May, 1981                 |
| 118. Aeshnidae       | <i>Aeschna mixta</i>             | 0.530 | 13.80  | 0.04  | 38   | Magnan, 1934              |
| 119. Cetoniidae      | <i>Cetonia aurata</i>            | 0.537 | 1.300  | 0.413 | 86   | Magnan, 1934              |
| 120. Macromiidae     | <i>Macromia georgina</i>         | 0.545 | 13.974 | 0.039 | 30.0 | May, 1981                 |
| 121. Apidae (6)      | <i>Eulaena cingulata</i>         | 0.547 | 2.03   | 0.27  | 128  | Casey <i>et al.</i> 1985  |
| 122. Aeschnidae      | <i>Brachytron pratense</i>       | 0.557 | 12.000 | 0.046 | 33   | Magnan, 1934              |
| 123. Sphingidae      | <i>Nyctophanes libya</i>         | 0.559 | 3.560  | 0.157 | 48.5 | Bartholomew & Casey, 1978 |
| 124. Saturniidae     | <i>Automeris hamata</i>          | 0.564 | 5.450  | 0.103 | 23.5 | Bartholomew & Casey, 1978 |
| 125. Vespidae        | <i>Vespa crabro</i>              | 0.567 | 2.600  | 0.218 | 100  | Magnan, 1934              |
| 126. Apidae (2)      | <i>Bombus lapidarius</i>         | 0.568 | 1.805  | 0.315 | 152  | Sotavalta, 1952           |
| 127. Sphingidae      | <i>Manduca lefeeburei</i>        | 0.571 | 4.920  | 0.116 | 33.1 | Bartholomew & Casey, 1978 |
| 128. Bombycidae      | <i>Bombyx rubi</i>               | 0.595 | 13.000 | 0.046 | 18   | Magnan, 1934              |
| 129. Melolonthidae   | <i>Melolontha vulgaris</i>       | 0.597 | 4.450  | 0.134 | 62   | Sotavalta, 1952           |
| 130. Vespidae        | <i>Vespa crabro</i>              | 0.597 | 3.040  | 0.196 | 104  | Sotavalta, 1952           |
| 131. Saturniidae     | <i>Philosamia cynthia</i>        | 0.605 | 50.000 | 0.012 | 8    | Magnan, 1934              |

*Table 1 continued*

Table 1. *Continued*

| Family               | Species                         | Mass<br>(g) | Wing area<br>(cm <sup>2</sup> ) | Wing<br>loading<br>(g cm <sup>-2</sup> ) | Wingbeat<br>frequency<br>(Hz) | Citation                  |
|----------------------|---------------------------------|-------------|---------------------------------|------------------------------------------|-------------------------------|---------------------------|
| 132. Aeshmidae       | <i>Aeschna rufescens</i>        | 0.611       | 17.80                           | 0.03                                     | 20                            | Magnan, 1934              |
| 133. Xylocopidae     | <i>Xylocopa violacea</i>        | 0.614       | 1.720                           | 0.357                                    | 130                           | Magnan, 1934              |
| 134. Spingidae (2)   | <i>Perigonia lusca</i>          | 0.638       | 2.470                           | 0.258                                    | 62.9                          | Bartholomew & Casey, 1978 |
| 135. Apidae (4)      | <i>Exaerete frontalis</i>       | 0.644       | 3.48                            | 0.19                                     | 87                            | Casey <i>et al.</i> 1985  |
| 136. Saturniidae     | <i>Automeris belti</i>          | 0.665       | 10.960                          | 0.061                                    | 14.4                          | Bartholomew & Casey, 1978 |
| 137. Spingidae       | <i>Pachyornis drucei</i>        | 0.702       | 4.770                           | 0.147                                    | 48.4                          | Bartholomew & Casey, 1978 |
| 138. Saturniidae     | <i>Automeris auletes</i>        | 0.720       | 8.090                           | 0.089                                    | 23.4                          | Bartholomew & Casey, 1978 |
| 139. Cicadidae       | <i>Cicada</i> sp.               | 0.752       | 7.64                            | 0.10                                     | 42                            | Ahmad, 1984               |
| 140. Aeshmidae       | <i>Anax junius</i>              | 0.820       | 21.02                           | 0.039                                    | 20.5                          | May, 1981                 |
| 141. Spingidae (2)   | <i>Xylophanes pluto</i>         | 0.829       | 4.430                           | 0.187                                    | 45.0                          | Bartholomew & Casey, 1978 |
| 142. Saturniidae (3) | <i>Adeloneivaia boisduvalii</i> | 0.839       | 5.564                           | 0.151                                    | 24.9                          | Bartholomew & Casey, 1978 |
| 143. Apidae          | <i>Bombus terrestris</i>        | 0.880       | 1.970                           | 0.447                                    | 156                           | Sotavalta, 1952           |
| 144. Hemiptera       | <i>Tessaratona javanica</i>     | 0.926       | 3.88                            | 0.239                                    | 66                            | Ahmad, 1984               |
| 145. Macromiidae     | <i>Macromia taeniolata</i>      | 0.930       | 20.217                          | 0.046                                    | 25.5                          | May, 1981                 |
| 146. Apidae (7)      | <i>Eulaema meriana</i>          | 0.940       | 3.46                            | 0.270                                    | 98                            | Casey <i>et al.</i> 1985  |
| 147. Melobonthidae   | <i>Melobontha vulgaris</i>      | 0.961       | 4.020                           | 0.239                                    | 46                            | Magnan, 1934              |
| 148. Saturniidae (3) | <i>Eacles imperialis</i>        | 1.105       | 12.600                          | 0.088                                    | 17.9                          | Bartholomew & Casey, 1978 |
| 149. Aeschnidae      | <i>Anax formosus</i>            | 1.200       | 22.80                           | 0.053                                    | 22                            | Magnan, 1934              |
| 150. Spingidae       | <i>Erimyiella ello</i>          | 1.210       | 5.480                           | 0.221                                    | 23.7                          | Bartholomew & Casey, 1978 |
| 151. Blattidae       | <i>Periplaneta americana</i>    | 1.555       | 10.44                           | 0.148                                    | 26                            | Ahmad, 1984               |
| 152. Spingidae       | <i>Acherontia atropos</i>       | 1.600       | 20.500                          | 0.078                                    | 22                            | Magnan, 1934              |
| 153. Apidae          | <i>Bombus</i> sp.               | 1.600       | 3.50                            | 0.46                                     | 125                           | Ahmad, 1984               |
| 154. Spingidae (4)   | <i>Manduca corallina</i>        | 1.618       | 10.270                          | 0.158                                    | 28.0                          | Bartholomew & Casey, 1978 |
| 155. Saturniidae     | <i>Synsphinx molina</i>         | 1.630       | 9.700                           | 0.168                                    | 22.9                          | Bartholomew & Casey, 1978 |
| 156. Spingidae (2)   | <i>Madoryx oculus</i>           | 1.699       | 4.715                           | 0.360                                    | 41.8                          | Bartholomew & Casey, 1978 |
| 157. Saturniidae     | <i>Saturnia pyri</i>            | 1.890       | 120.000                         | 0.016                                    | 8                             | Magnan, 1934              |
| 158. Lucanidae       | <i>Lucanus cervus</i>           | 2.600       | 8.000                           | 0.325                                    | 33                            | Magnan, 1934              |
| 159. Spingidae       | <i>Manduca rustica</i>          | 2.704       | 10.720                          | 0.252                                    | 29.5                          | Bartholomew & Casey, 1978 |
| 160. Spingidae (2)   | <i>Oryba achemenides</i>        | 2.809       | 10.200                          | 0.275                                    | 39.9                          | Bartholomew & Casey, 1978 |

\* Numbers presented parenthetically in columns 3-6 indicate the levels of ranking, within the 160 insects tabulated, of the Homoptera studied here.

† Where a number is presented parenthetically in column 1, the values tabulated are means from several individuals in the literature. The number in parentheses indicates from how many individuals the data are derived.



Table 2. Wing length (in mm) of measured homopterous insects

| Species                              |          | $\bar{X}$ | N  | Coefficient of variation (%) |
|--------------------------------------|----------|-----------|----|------------------------------|
| <i>Acyrtosiphon kondoi</i>           | forewing | 3.39      | 20 | 3.5                          |
|                                      | hindwing | 1.93      | 20 | 5.8                          |
| <i>Aleurothrixus floccosus</i>       | forewing | 1.52      | 20 | 4.3                          |
|                                      | hindwing | 0.94      | 20 | 8.3                          |
| <i>Aphis fabae</i>                   | forewing | 2.66      | 20 | 6.1                          |
|                                      | hindwing | 1.62      | 20 | 8.1                          |
| <i>Aphis gossypii</i>                | forewing | 2.18      | 20 | 7.9                          |
|                                      | hindwing | 1.37      | 20 | 9.5                          |
| <i>Aphis nerii</i>                   | forewing | 2.94      | 20 | 6.6                          |
|                                      | hindwing | 1.75      | 20 | 7.0                          |
| <i>Bemisia tabaci</i>                | forewing | 0.84      | 20 | 5.6                          |
|                                      | hindwing | 0.69      | 20 | 7.2                          |
| <i>Dialeurodes citri</i><br>(female) | forewing | 1.37      | 20 | 3.6                          |
|                                      | hindwing | 1.16      | 20 | 4.3                          |
| <i>Dialeurodes citri</i><br>(male)   | forewing | 1.16      | 20 | 8.9                          |
|                                      | hindwing | 0.93      | 20 | 4.0                          |
| <i>Myzus persicae</i>                | forewing | 3.08      | 20 | 5.2                          |
|                                      | hindwing | 1.89      | 20 | 8.5                          |
| <i>Trialeurodes abutilonea</i>       | forewing | 0.98      | 20 | 11.3                         |
|                                      | hindwing | 0.78      | 20 | 13.1                         |
| <i>Trialeurodes vaporariorum</i>     | forewing | 0.99      | 20 | 5.4                          |
|                                      | hindwing | 0.84      | 20 | 10.1                         |

### Wingbeat frequency

The two families could also be separated by wingbeat frequency (Table 1). Aphids had significantly lower wingbeat frequencies than whiteflies (range 81.1–123.4 Hz for aphids, 165.6–224.2 Hz for whiteflies) ( $P < 0.01$ ). Within the groups, only two aphids, *Ap. nerii* and *Ap. gossypii*, and two whiteflies, *Al. floccosus* and *B. tabaci*, had wingbeat frequencies not significantly different from one another ( $P > 0.05$ ).

### Wing loading

Calculated wing loadings for aphids ( $6.33 \times 10^{-3}$  to  $0.01412 \text{ g cm}^{-2}$ ) were all larger than those of whiteflies ( $1.74$ – $5.23 \times 10^{-3} \text{ g cm}^{-2}$ ; Table 1).

### Relationships between wingbeat frequency and morphometrics

Relationships between wingbeat frequency and various body morphometrics, such as wing area and length, body mass and wing loading, were evaluated for all measured insect species (exclusive of *D. citri*) (Table 3). Coefficients of determination ( $r^2$ ) revealed that wingbeat frequency was most closely linked with body mass

Table 3. *Relationships between wingbeat frequency and body morphometrics for selected members of Aleyrodidae and Aphididae*

| Body characteristic | Coefficient of determination |                | Significance<br><i>P</i> < |
|---------------------|------------------------------|----------------|----------------------------|
|                     | <i>r</i> <sup>2</sup>        | <i>F</i> value |                            |
| Forewing area       | 0.6939                       | 7.43           | 0.05                       |
| Hindwing area       | 0.5569                       | 3.60           | NS                         |
| Total area          | 0.6651                       | 6.35           | NS                         |
| Forewing length     | 0.9261                       | 48.23          | 0.001                      |
| Hindwing length     | 0.9160                       | 41.69          | 0.001                      |
| Body mass           | 0.8275                       | 17.37          | 0.005                      |
| Wing loading        | 0.6680                       | 6.45           | 0.05                       |

NS, not significant.

and fore- and hindwing length: 68% of the variation in wingbeat frequency was attributable to body mass, and >80% to length of both the forewings and hindwings. Compared with whiteflies, aphids generally have lower wingbeat frequencies and higher wing loading.

#### *Relationships with other insects*

Our homopterans weighed less than all the insects whose flight-associated morphometrics were measured in previous studies. Masses ranged from  $3.3 \times 10^{-5}$  g (*B. tabaci*) to 2.809 g (*Oryba achemenides*) (Table 1). Using total wing surface area as a criterion for size, our homopterans are among the smallest insects for whom wing loading and wingbeat frequencies have been calculated. The range of wing surface areas was from  $9.6 \times 10^{-3}$  cm<sup>2</sup> (*T. abutilonea*) to 120.00 cm<sup>2</sup> (*Saturnia pyri*). Our largest homopteran ranked only fourteenth out of 160.

The ratio of body mass to wing surface area was also low in the 11 homopterans, with five having wing loading values lower than any in the literature. The 160 insects ranged from  $1.74 \times 10^{-3}$  g cm<sup>-2</sup> for male *D. citri* to 0.460 g cm<sup>-2</sup> for *Bombus* spp. None of those we measured exhibited a wing loading that ranked higher than 22nd out of 160 (Table 1). For wingbeat frequencies, our homopterans exhibited some of the highest values within the recorded range of 8–480 Hz (Table 1). Rankings for whiteflies and aphids ranged from 89th to 152nd of 158.

We were also interested in the statistical relationship between body mass, wing loading and wingbeat frequency for all insects either in the literature or measured herein. Since *D. citri* was not included (for reasons discussed previously) the statistical comparisons involve 158 species. Using wing loading as the independent variable and calculating coefficients of determination for all 158 insects, we found that wing loading accounted for only 5.5% of the variation in wingbeat frequency ( $r^2 = 0.0550$ , *F* value = 9.08). Similar calculations using body mass as the independent variable indicate that this parameter accounted for 14% of the variation in wingbeat frequency ( $r^2 = 0.1378$ , *F* value = 24.92). Considering both mass (first

entry) and wing loading (second entry) as independent variables in a stepwise regression, we found that 34% of the variation in wingbeat frequency was attributable to these two parameters ( $r^2 = 0.344$ ,  $F$  value = 40.58).

Relationships between body mass, wing loading and wingbeat frequency became clearer after data had been sorted according to mass. The 158 species were divided into six groups of roughly equal size. Insects weighing more than 0.03 g had to be separated into groups because slopes for regression lines for wingbeat frequency and wing loading were significantly different ( $P < 0.015$ ) (Table 4). The slope for animals weighing 0.030–0.104 g was 1050.0, whereas the slope for insects weighing 0.720–2.809 g was 221.8. Coefficients of determination were calculated for the species within each mass group (Table 4). Examination of the  $F$  values indicated that the linear relationship between wingbeat frequency and wing loading was highly significant for all mass groups with the exception of the lightest animals (i.e. < 0.03 g) ( $P < 0.001$ ).

The importance of excluding the smaller insects from considerations of the relationships between wingbeat frequency and wing loading became more apparent when coefficients of determination were calculated for all insect species weighing > 0.03 g (Table 5). A log transformation of the independent variable, wing loading, and a log/log transformation of both the independent variable and the dependent variable, wingbeat frequency, improved the goodness-of-fit as shown by an increase in  $F$  values from 43.96 to 135.88. Similar transformation of data for insects weighing < 0.03 g did little to improve the goodness-of-fit, as  $F$  values increased from 2.87 to 3.72. Log and log/log transformation for insect species in the larger mass groups decreased  $F$  values, indicating a clearly linear relationship.

We attempted to identify the relationship between wingbeat frequency and wing loading for the various taxa shown in Table 1. Although a few cases, e.g. members of Spingidae, showed significant correlations, the majority did not. The lack of significant correlations may have been due to small sample sizes or situations where animals were arbitrarily selected because of a taxonomic relationship from groups with different slopes.

#### DISCUSSION

In terms of flight-associated morphometrics, the two measured families differed from one another in all important parameters considered: body mass, wingbeat frequency and wing loading. These data support the earlier observation concerning distribution of whiteflies and aphids in air columns. Our data also demonstrate that, although closely related, these insects employ different methods of flight.

The relationship between wingbeat frequency and wing loading is of special significance. The finding that whiteflies had a higher wingbeat frequency and a lower wing loading than aphids was unexpected. Other authors have argued that insects with heavy bodies in relation to total wing surface area should beat their wings more rapidly than insects of similar mass, but with larger wing surface areas (Dorsett, 1962; Bartholomew & Heinrich, 1973). This seems to be theoretically correct as well

Table 4. Coefficients of determination for the regression equation  $y = a + bx$  where  $y = \text{wingbeat frequency}$  and  $x = \text{wing loading}$  for all insects

| Mass range (g) | N   | Coefficient of determination $r^2$ | F value of regression | Significance $P <$ | Slope  | t value* of slope | Significance $P <$ |
|----------------|-----|------------------------------------|-----------------------|--------------------|--------|-------------------|--------------------|
| 0.000033-0.030 | 27  | 0.1030                             | 2.87                  | NS                 | 938.7  | 3.25              | 0.015              |
| 0.030-0.104    | 27  | 0.7780                             | 87.56                 | 0.001              | 1050.0 | 2.83              | 0.01               |
| 0.107-0.201    | 27  | 0.8904                             | 203.17                | 0.001              | 814.7  | 4.54              | 0.001              |
| 0.226-0.399    | 27  | 0.9034                             | 233.78                | 0.001              | 519.9  | 4.02              | 0.001              |
| 0.425-0.702    | 27  | 0.7483                             | 74.32                 | 0.001              | 333.4  | 3.38              | 0.001              |
| 0.720-2.809    | 23  | 0.6020                             | 31.76                 | 0.001              | 221.8  |                   |                    |
| All insects    |     |                                    |                       |                    |        |                   |                    |
| 0.000033-2.809 | 159 | 0.0550                             | 9.08                  | 0.001              | 186.1  |                   |                    |

\* Calculated t value for differences between slopes. NS, not significant.

as agreeing with other authors' (Ahmad, 1984; Greenewalt, 1962) statements about birds and bats, which apparently also employ an increased wingbeat frequency tactic.

This study of wingbeat frequency and wing loading in our measured homopterans (as well as other small insects) has helped shed some light on these relationships among insects in general, about which differing conclusions have been drawn. Certain authors have concluded that wing loading and wingbeat frequency are significantly correlated, especially if wing lengths are part of the equation (e.g. May, 1981). Others, such as Bartholomew & Casey (1978), are less certain of such a relationship and suggest that it is variable. Finally, others (Casey, May & Morgan, 1985) state no such relationship could be established for insect species they studied.

Our data demonstrate that among groups of larger insects wingbeat frequency and wing loading are significantly correlated, conforming to the hypothesis that animals with high wing loading compensate by using higher wingbeat frequencies. The differences in the steepness of the slopes of regression lines for each group indicate that smaller insects employ increased wingbeat tactic at rates exponentially higher than for larger insects.

Previous authors whose data failed to indicate a correlation between these two parameters may have considered either too few subjects or mixed insect species whose body masses were dramatically different. Casey *et al.* (1985) measured euglossine bees and showed that their wingbeat frequencies were inversely correlated with wing length and mass, but not with wing loading. We incorporated their data on bees into our larger data set, selecting groups of the same size as those used in our calculations (i.e.  $26 \pm 2$ ), which included their insects. The correlation between wing loading and wingbeat frequency for the groups was highly significant for each ( $P < 0.001$ ) (Table 6). Similar incorporations and recalculations were made using the data for members of the Sphingidae and Saturniidae generated by Bartholomew

Table 5. *Coefficient of determination for log transformations where y = wingbeat frequency and x = wing loading*

| Mass range (g)                                  | Coefficient of determination<br>$r^2$ | F value | Significance<br>$P <$ |
|-------------------------------------------------|---------------------------------------|---------|-----------------------|
| $3.3 \times 10^{-5}$ to 2.809 (all insects)     |                                       |         |                       |
| no transformation                               | 0.0550                                | 9.08    | 0.003                 |
| log transformation of x                         | 0.0623                                | 10.36   | 0.002                 |
| log/log transformation                          | 0.3831                                | 26.68   | 0.001                 |
| 0.03–2.809 (without smallest insects)           |                                       |         |                       |
| no transformation                               | 0.2542                                | 43.96   | 0.001                 |
| log transformation of x                         | 0.3498                                | 69.41   | 0.001                 |
| log/log transformation                          | 0.6489                                | 135.87  | 0.001                 |
| $3.3 \times 10^{-5}$ to 0.03 (smallest insects) |                                       |         |                       |
| no transformation                               | 0.1030                                | 2.87    | 0.1                   |
| log transformation of x                         | 0.1227                                | 3.49    | 0.073                 |
| log/log transformation                          | 0.1294                                | 3.72    | 0.065                 |

Table 6. *Relationship between wingbeat frequency and wing loading among members of Apidae, Saturniidae and Sphingidae determined after combining referenced data*

| Family      | N  | Mass range*<br>(g) | Coefficient of<br>determination<br>$r^2$ | F value | Significance<br>$P <$ |
|-------------|----|--------------------|------------------------------------------|---------|-----------------------|
| Apidae      | 26 | 0.071–0.144        | 0.8369                                   | 123.11  | 0.001                 |
|             | 26 | 0.144–0.291        | 0.8836                                   | 182.16  | 0.001                 |
|             | 26 | 0.298–0.547        | 0.7212                                   | 62.09   | 0.001                 |
|             | 25 | 0.557–0.940        | 0.8392                                   | 120.04  | 0.001                 |
| Saturniidae | 28 | 0.168–0.318        | 0.8879                                   | 205.86  | 0.001                 |
|             | 27 | 0.345–0.595        | 0.7159                                   | 62.99   | 0.001                 |
|             | 27 | 0.597–1.631        | 0.7573                                   | 78.07   | 0.001                 |
| Sphingidae  | 27 | 0.388–0.638        | 0.7280                                   | 66.93   | 0.001                 |
|             | 26 | 0.644–2.809        | 0.5712                                   | 31.37   | 0.001                 |

\*Data from Table 4.

& Casey (1978). Results were the same, i.e. correlations between wingbeat frequency and wing loading were highly significant ( $P < 0.001$ ) (Table 6).

For very small insects, the lack of relationship may be explained by the fact that some minute species solve the problem of staying aloft in unique ways. Some, like whiteflies (Wootton & Newman, 1979) and *Drosophila* (Weis-Fogh, 1972), employ a clap and fling mechanism to generate extra lift. This reduces the need for exceptionally high wingbeat frequencies, and agrees with the data presented here. Our data also support Pringle's (1976) correct prediction that, because they have exceptionally low wing loadings, whiteflies would not have the high wingbeat frequencies commonly associated with small insects (e.g. 480 Hz for *Aedes aegypti*; Table 1). Whitefly wingbeat frequencies are rather more correctly characterized as being mid-range (here 165.6–224.2 Hz; Table 1). The same strategy may be employed by other insects weighing  $< 0.03$  g. A third possibility is that many small insects accomplish flight in a manner similar to that reported for aphids (Haine, 1955), i.e. by relying to a large extent on an ability to use wind currents passively. Being small, they have low settling velocities because of high drag coefficients. Any of these strategies would help explain why small insects may not conform to the generalization that animals with high wing loading have a high wingbeat frequency (e.g. members of Hymenoptera) and that insects with low wing loading have a low wingbeat frequency (e.g. members of Lepidoptera). Any group of small insects may contain several statistical 'outliers', resulting in a lack of relationship between wingbeat frequency and wing loading.

The authors thank T. S. Bellows and T. R. Unruh of the University of California, Riverside and D. Coudriet of USDA, Riverside for supplying and measuring some insects. We thank P. K. von Bretzel, H. E. DeVries, S. K. Sakaluk, F. G. Werner and R. L. Smith of the University of Arizona for their valuable comments during

manuscript preparation. Finally, we thank E. A. Draeger and D. W. Zeh of the University of Arizona for their invaluable efforts in providing technical assistance during the course of this study. Journal Series No. 4241 of the University of Arizona Agricultural Experimental Station.

## REFERENCES

- AHMAD, A. (1984). A comparative study on flight surface and aerodynamic parameters of insects, birds and bats. *Indian J. exp. Biol.* **22**, 270–278.
- ANSARI, A. R. & BRADLEY, R. A. (1960). Rank-sum tests for dispersions. *Ann. Math. Stat.* **31**, 1174–1189.
- BARTHOLOMEW, G. A. & CASEY, T. M. (1978). Oxygen consumption of moths during rest, pre-flight warm-up, and flight in relation to body size and wing morphology. *J. exp. Biol.* **76**, 11–25.
- BARTHOLOMEW, G. A. & HEINRICH, B. (1973). A field study of flight temperatures in moths in relation to body weight and wing loading. *J. exp. Biol.* **58**, 123–135.
- BROADBENT, L. (1948). Aphid migration and the efficiency of the trapping method. *Ann. Appl. Biol.* **35**, 379–394.
- BYRNE, D. N., VON BRETZEL, P. K. & HOFFMAN, C. J. (1986). Impact of trap design and placement when monitoring for the bandedwinged whitefly and the sweetpotato whitefly. *Environ. Entomol.* **15**, 300–304.
- CASEY, T. M. (1981). Energetics and thermoregulation of *Malacosoma americanum* (Lepidoptera: Lasiocampidae) during hovering flight. *Physiol. Zool.* **54**, 362–371.
- CASEY, T. M., MAY, M. L. & MORGAN, K. R. (1985). Flight energetics of euglossine bees in relation to morphology and wing stroke frequency. *J. exp. Biol.* **116**, 271–289.
- DORSETT, D. A. (1962). Preparation for flight by hawk-moths. *J. exp. Biol.* **39**, 579–588.
- GREENEWALT, C. H. (1962). Dimensional relationships for flying animals. *Smithson. Misc. Collns.* **144**, 1–46.
- HAINÉ, E. (1955). Aphid take-off in controlled wind speeds. *Nature, Lond.* **175**, 474–475.
- MAGNAN, A. (1934). *La Locomotion Chez les Animaux*, vol. 1, *Le Vol des Insectes*. Paris: Hermann & Co. 183 pp.
- MANN, H. B. & WHITNEY, D. R. (1947). On a test of whether one of two random variables is stochastically larger than the other. *Ann. Math. Statistics.* **18**, 50–60.
- MAY, M. L. (1981). Wingstroke frequency of dragonflies (Odonata: Anisoptera) in relation of temperature and body size. *J. comp. Physiol.* **144**, 229–240.
- PRINGLE, J. W. S. (1976). The muscles and sense organs involved in insect flight. In *Insect Flight* (ed. R. C. Rainey), pp. 3–15. New York: John Wiley & Sons.
- SHAPIRO, S. S. & WILK, M. B. (1965). An analysis of variance test for normality (complete samples). *Biometrika* **52**, 591–611.
- SOTAVALTA, O. (1952). The essential factor regulating the wing stroke frequency of insects in wing mutilation and loading experiments and in experiments at subatmospheric pressure. *Ann. Zool. Soc. "Vanamo"* **15**, 1–67.
- UNWIN, D. M. & ELLINGTON, C. P. (1979). An optical tachometer for measurement of the wing-beat frequency of free-flying insects. *J. exp. Biol.* **82**, 377–378.
- VOGEL, S. (1966). Flight in *Drosophila*. I. Flight performance of tethered flies. *J. exp. Biol.* **44**, 567–578.
- WEIS-FOGH, T. (1972). Energetics of hovering flight in hummingbirds and *Drosophila*. *J. exp. Biol.* **56**, 79–104.
- WEIS-FOGH, T. (1973). Quick estimates of flight fitness in hovering animals, including novel mechanisms for lift production. *J. exp. Biol.* **59**, 169–230.
- WOOTTON, R. J. & NEWMAN, D. J. S. (1979). Whitefly have the highest contraction frequencies yet recorded in non-fibrillar muscles. *Nature, Lond.* **280**, 402–403.
